# Supplementary material for: Opposing Effects of Ceanothus velutinus Phytochemistry on Herbivore Communities at Multiple Scales
Source: MDPI journal article supplement (doi:10.3390/metabo11060361), 2021-06-07
Supplement: s1 [file s1]

## Supplemental Information

**Table S1.** *Ceanothus velutinus* composition of plots at Dog Valley and Mt. Rose sites.

| Site       | Subsite | Plot | Elevation | Leaf<br>Abundance | Mean Leaves<br>Per Plant <sup>†</sup> | Plant<br>Abundance |
|------------|---------|------|-----------|-------------------|---------------------------------------|--------------------|
| Dog Valley | 1       | 192  | 1632      | 10000             | 10000                                 | 1                  |
|            | 1       | 194  | 1656      | 10000             | 10000                                 | 1                  |
|            | 1       | 187  | 1659      | 13600             | 6800±6200                             | 2                  |
|            | 2       | 193  | 1898      | 6215              | 390±90                                | 16                 |
|            | 2       | 189  | 1939      | 10500             | 660±128                               | 16                 |
|            | 2       | 186  | 1947      | 18290             | 590±90                                | 31                 |
|            | 3       | 191  | 2182      | 7800              | 2600±945                              | 3                  |
|            | 3       | 190  | 2185      | 11900             | 2980±2350                             | 4                  |
|            | 3       | 188  | 2236      | 15000             | 15000                                 | 1                  |
| Mt. Rose   | 1       | 195  | 1824      | 14000             | 1750±350                              | 8                  |
|            | 1       | 198  | 1837      | 8500              | 1700±780                              | 5                  |
|            | 1       | 196  | 1839      | 3600              | 1800±600                              | 2                  |
|            | 2       | 201  | 2162      | 1500              | 750±450                               | 2                  |
|            | 2       | 203  | 2183      | 5150              | 1030±500                              | 5                  |
|            | 2       | 202  | 2188      | 10500             | 2100±1090                             | 5                  |
|            | 3       | 200  | 2525      | 2500              | 2500                                  | 1                  |
|            | 3       | 199  | 2541      | 45000             | 45000                                 | 1                  |
|            | 3       | 197  | 2550      | 9000              | 9000                                  | 1                  |

<sup>†</sup> ±S.E.M.

**Table S2.** Mean and standard deviation of physicochemical properties of *C. velutinus* compounds within Gaussian model clusters.

| Odd-mass compounds |          |      |                 |      |           |         |         |                     |
|--------------------|----------|------|-----------------|------|-----------|---------|---------|---------------------|
| Cluster            | rt (sec) |      | <i>m/z</i> (Da) |      | RMD (ppm) |         | # peaks | Predominant class   |
|                    | mean     | sdev | mean            | sdev | mean      | sdev    |         |                     |
| 1                  | 282      | 155  | 257             | 127  | 478.111   | 157.358 | 18      | Peptide             |
| 2                  | 725      | 126  | 272             | 105  | 341.000   | 102.720 | 13      | Flavonoid aglycone  |
| 3                  | 413      | 73   | 316             | 24   | 228.188   | 51.432  | 16      | Flavonoid glycoside |
| 4                  | 938      | 104  | 553             | 53   | 815.455   | 95.225  | 22      | Lipid               |
| 5                  | 419      | 62   | 497             | 38   | 223.667   | 52.381  | 15      | Flavonoid glycoside |
| 6                  | 390      | 74   | 582             | 104  | 326.636   | 70.305  | 11      | Flavonoid glycoside |
| 7                  | 896      | 64   | 618             | 20   | 456.000   | 39.266  | 14      | Peptide             |
| 8                  | 858      | 319  | 885             | 103  | 486.182   | 184.383 | 11      | Phospholipids       |
| 9                  | 937      | 46   | 797             | 49   | 648.800   | 65.698  | 5       | Phospholipids       |

  

| Even-mass compounds |          |      |                 |      |           |         |         |                   |
|---------------------|----------|------|-----------------|------|-----------|---------|---------|-------------------|
| Cluster             | rt (sec) |      | <i>m/z</i> (Da) |      | RMD (ppm) |         | # peaks | Predominant class |
|                     | mean     | sdev | mean            | sdev | mean      | sdev    |         |                   |
| 1                   | 510      | 290  | 439             | 161  | 635.667   | 155.669 | 24      | Peptide           |
| 2                   | 1062     | 46   | 572             | 70   | 863.500   | 48.483  | 18      | Lipid             |
| 3                   | 367      | 64   | 550             | 52   | 287.000   | 106.737 | 6       | Peptide           |
| 4                   | 1088     | 41   | 839             | 126  | 296.500   | 9.958   | 10      | Unknown           |
| 5                   | 996      | 47   | 784             | 25   | 728.250   | 34.773  | 20      | Phospholipids     |
| 7                   | 1086     | 43   | 296             | 11   | 864.922   | 103.396 | 9       | Unknown           |

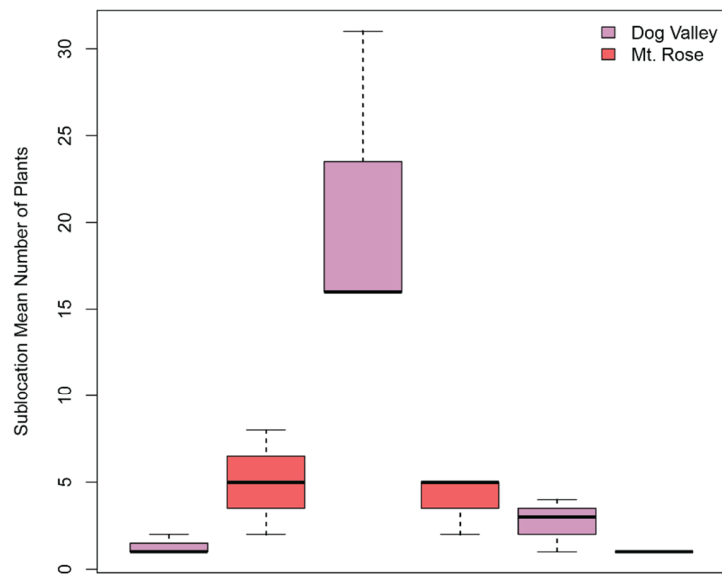

(a)

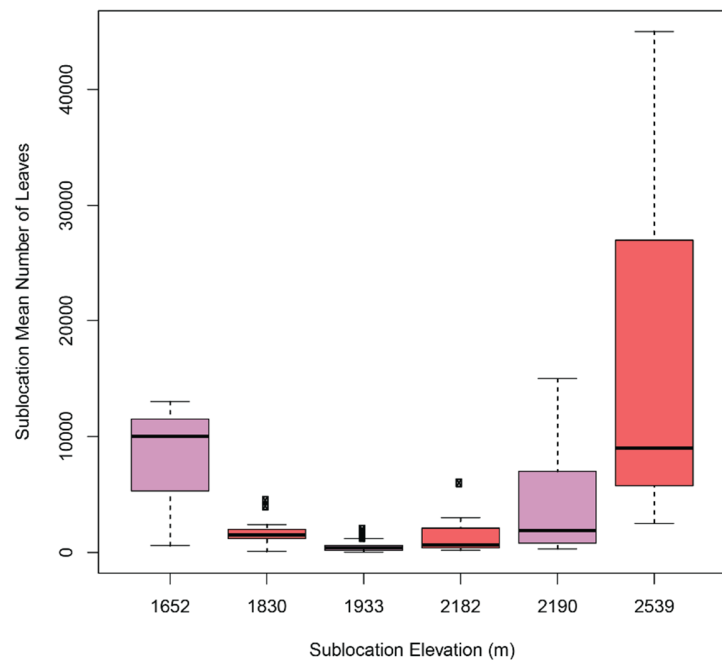

(b)

**Figure S1.** Subsite-level *C. velutinus* abundance. (a) Boxplot of the number of *C. velutinus* individuals by subsite across an elevational gradient. (b) Number of leaves at the subsite level across an elevational gradient. In Dog Valley, more established plants (more leaves) are found at lower elevations, with higher numbers of younger plants at higher elevations. In Mount Rose, more established plants are at higher elevations with younger populations at lower elevations.

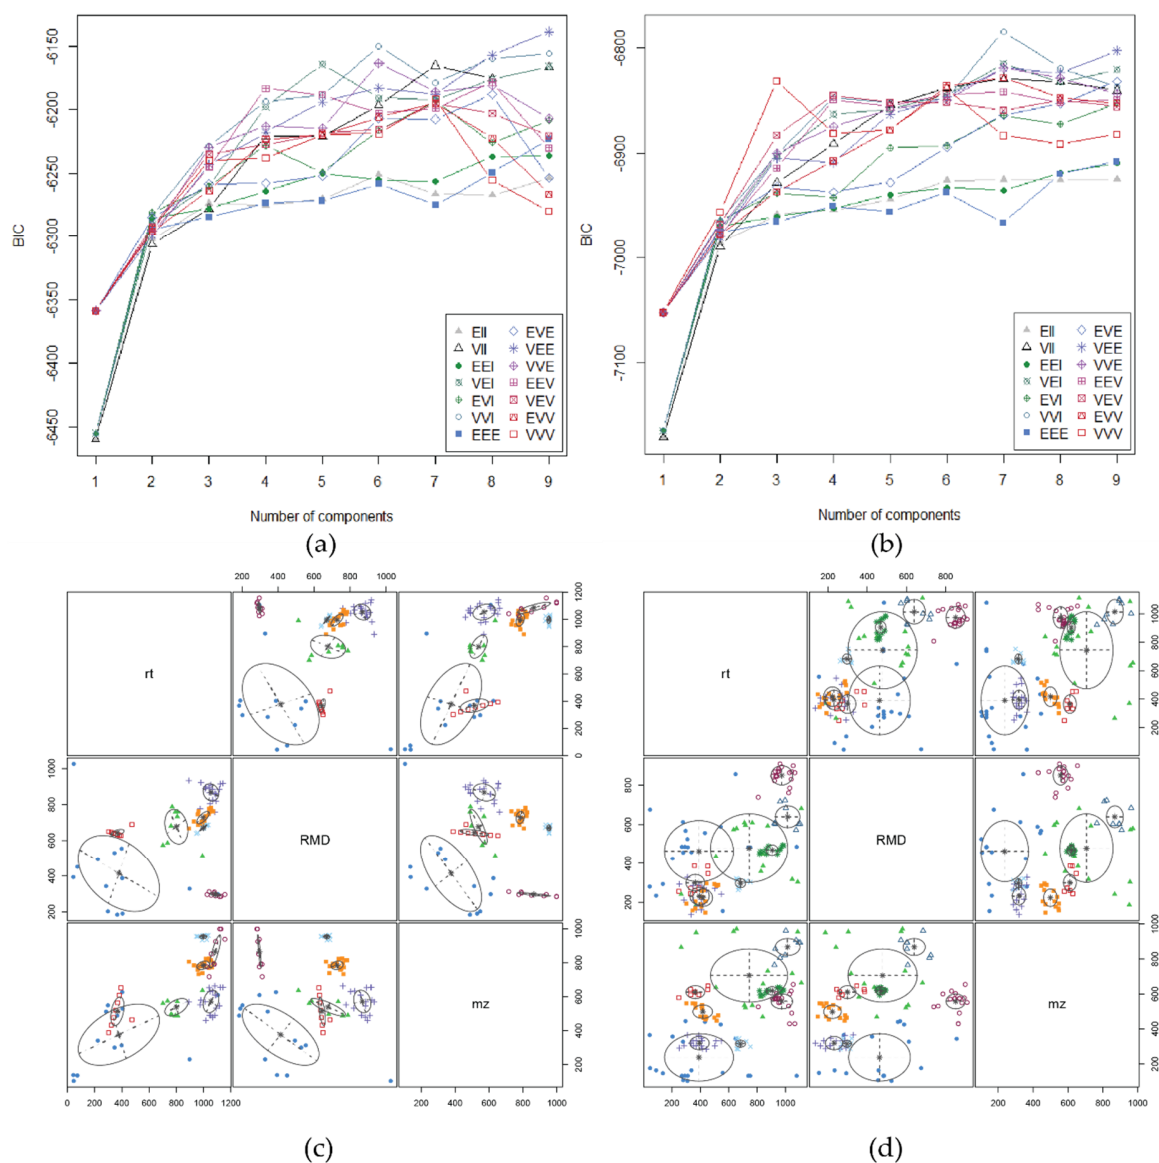

**Figure S2.** Gaussian cluster model of partitioned odd and even mass features based on the physicochemical properties of 176 compounds found in *C. velutinus*. **(a)** Model comparisons for odd  $m/z$  phytochemicals, model VEE and nine clusters were selected based on the highest Bayesian Information Criterion (BIC). **(b)** Model comparisons for even  $m/z$  phytochemicals, model VVI with seven clusters were selected based on the highest BIC value. Models listed in the legend (e.g. VEE) represent different combinations of the geometric characteristics (distribution, volume, shape, and orientation) of clusters models. **(c)** Gaussian model cluster groups based on retention time (rt), relative mass defect (RMD) and mass-to-charge ratio (mz) of odd  $m/z$  phytochemicals. **(d)** Gaussian model cluster groups based on retention time (rt), relative mass defect (RMD) and mass-to-charge ratio (mz) of even  $m/z$  phytochemicals.

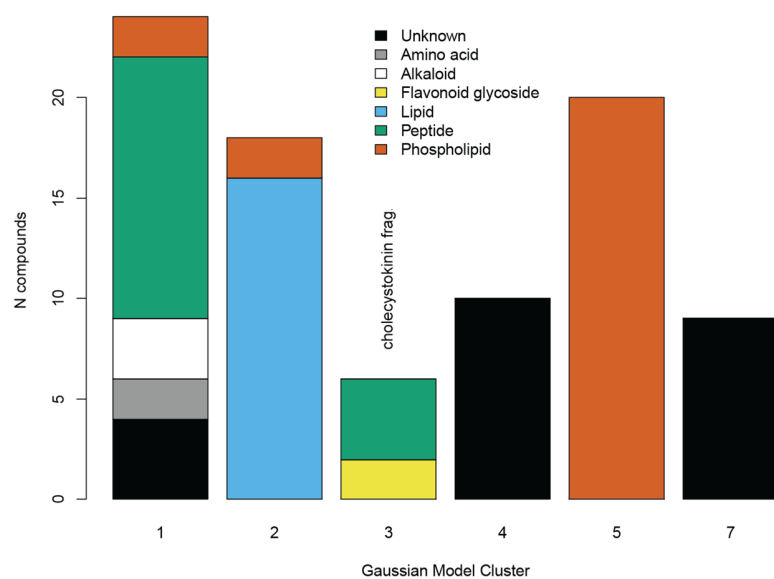

(a)

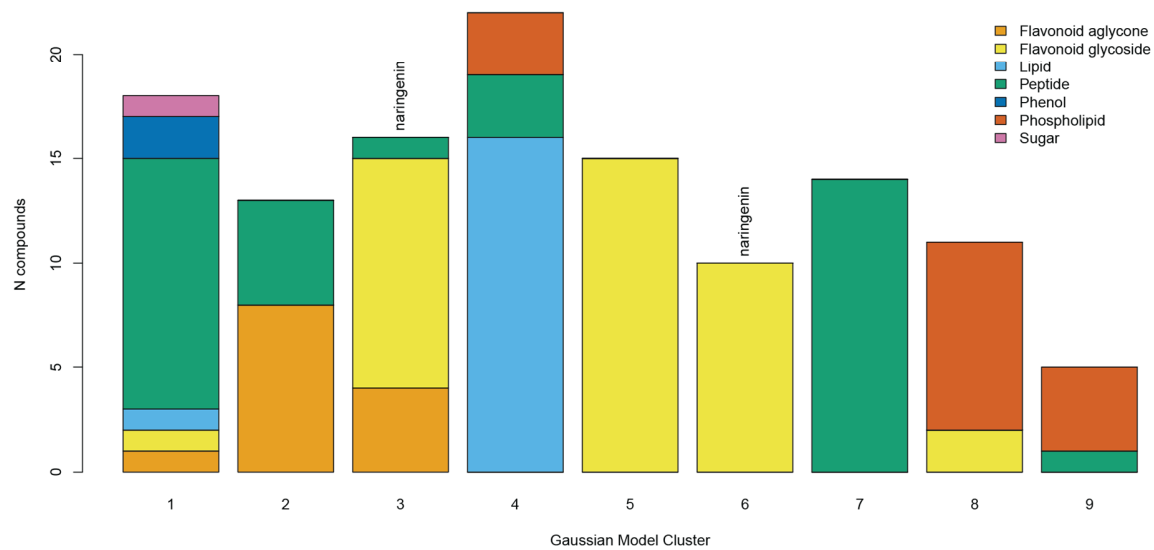

(b)

**Figure S3.** Bar plots showing the proportion of each compound class after cluster-guided annotation represented by Gaussian Model Clusters. **(a)** even  $m/z$  clusters representing presumably nitrogenous compounds. **(b)** odd  $m/z$  clusters representing presumably non-nitrogenous compounds

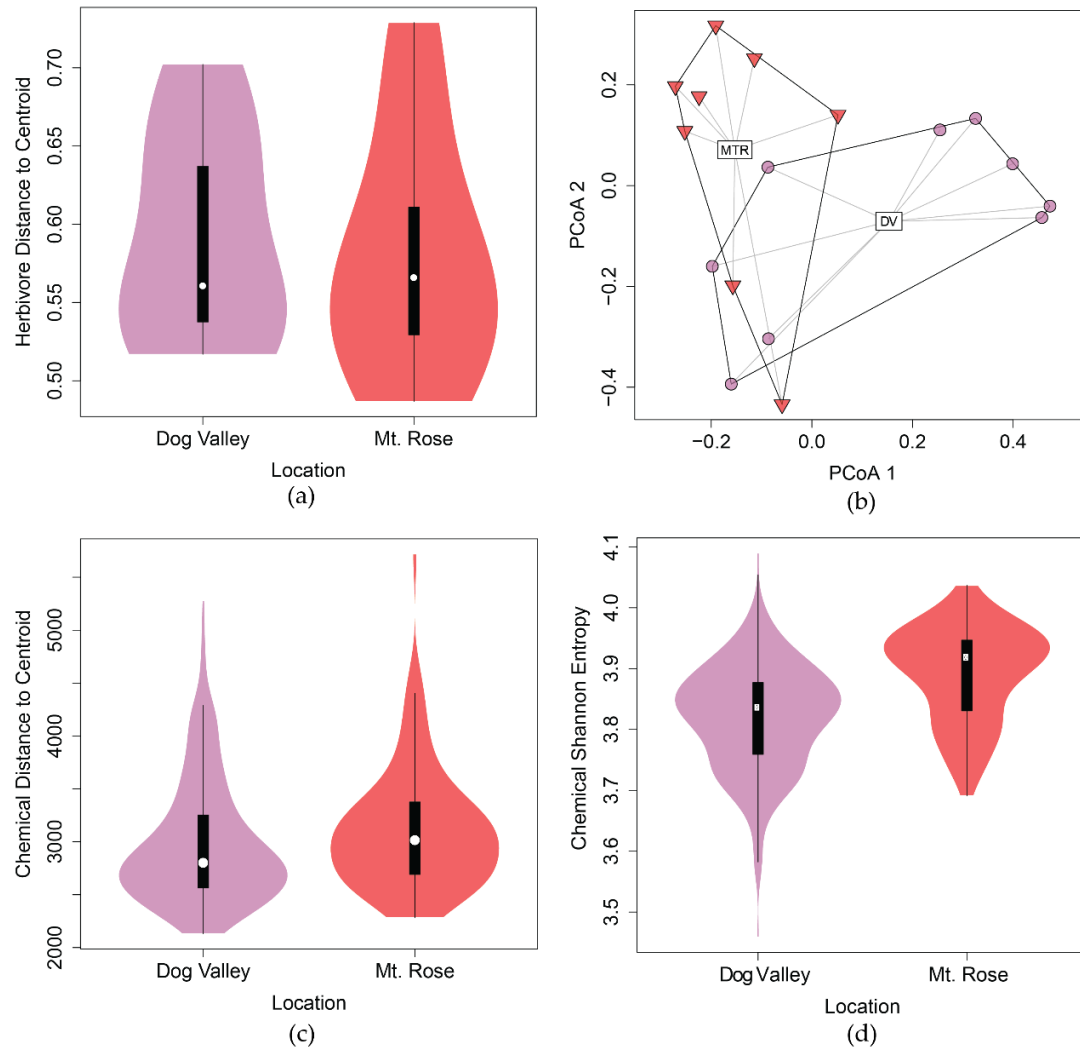

**Figure S4.** Herbivore dispersion **(a)** and composition **(b)**, phytochemical dispersion **(c)** and phytochemical diversity **(d)** at Dog Valley and Mt. Rose sites. Neither site differed significantly by herbivore or phytochemical dispersion ( $\text{ANOVA}_{1,283} p > 0.05$ ), but herbivore composition differed significantly ( $\text{ADONIS}_{1,283} p < 0.01$ ), as did mean phytochemical diversity (Shannon entropy,  $\text{ANOVA}_{1,283} p > 0.001$ ). MTR: Mt. Rose site; DV: Dog Valley. The principal coordinate analysis (PCoA, Jaccard) plot in **b** shows how herbivore composition differs between the two sites, but not herbivore variance.

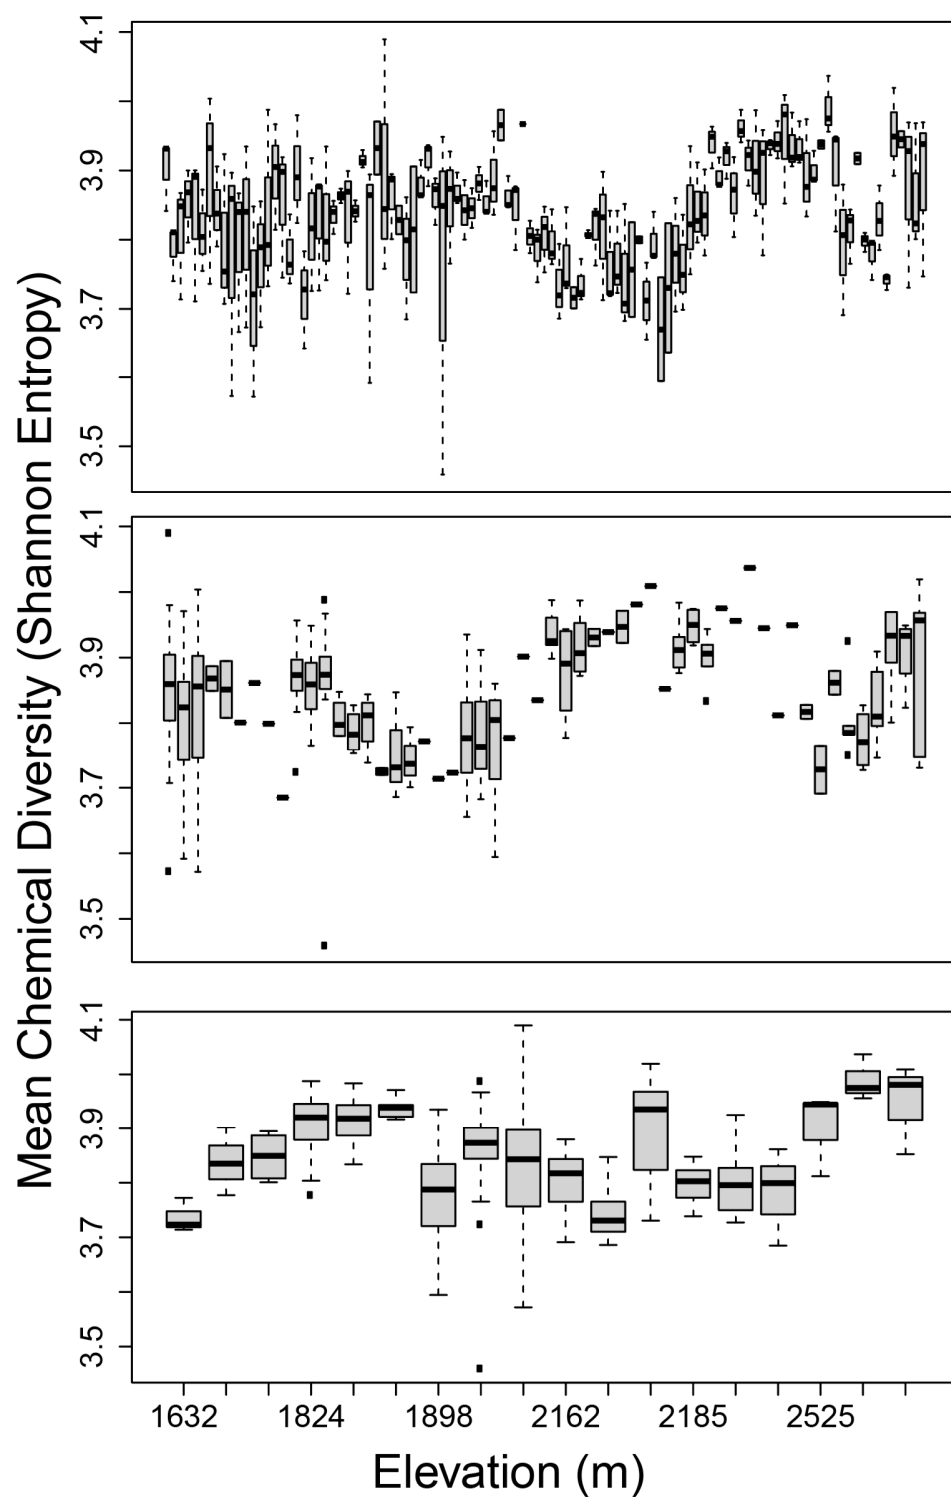

**Figure S5.** Boxplots of chemical diversity at multiple levels. Mean chemical diversity varied significantly at the (a) individual across month (ANOVA<sub>104,196</sub>;  $p < 0.001$ ), (b) collection month within-plot across individual (ANOVA<sub>53,247</sub>;  $p < 0.001$ ), and (c) plot (ANOVA<sub>5,295</sub>;  $p < 0.001$ ) levels. All levels of phytochemical diversity showed a sinusoidal relationship with elevation.

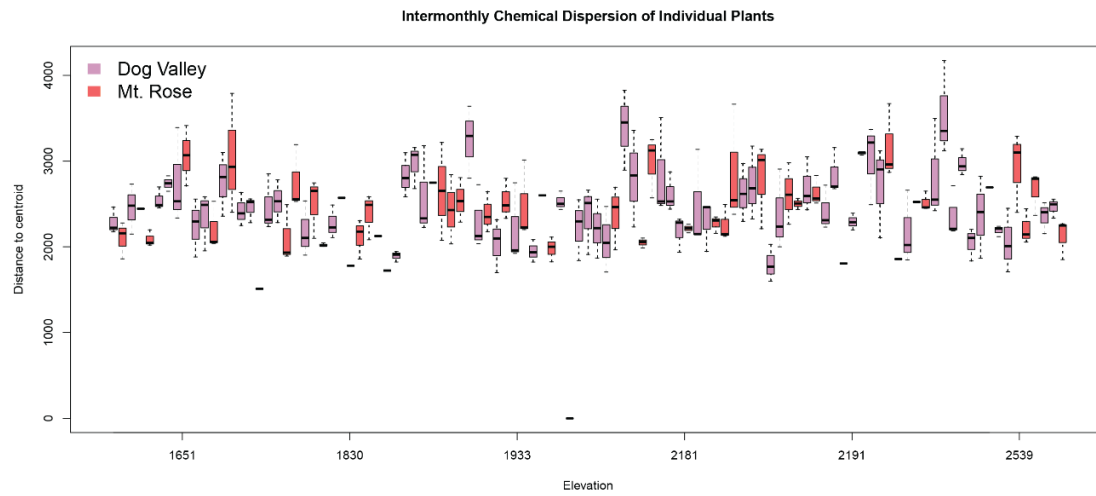

(a)

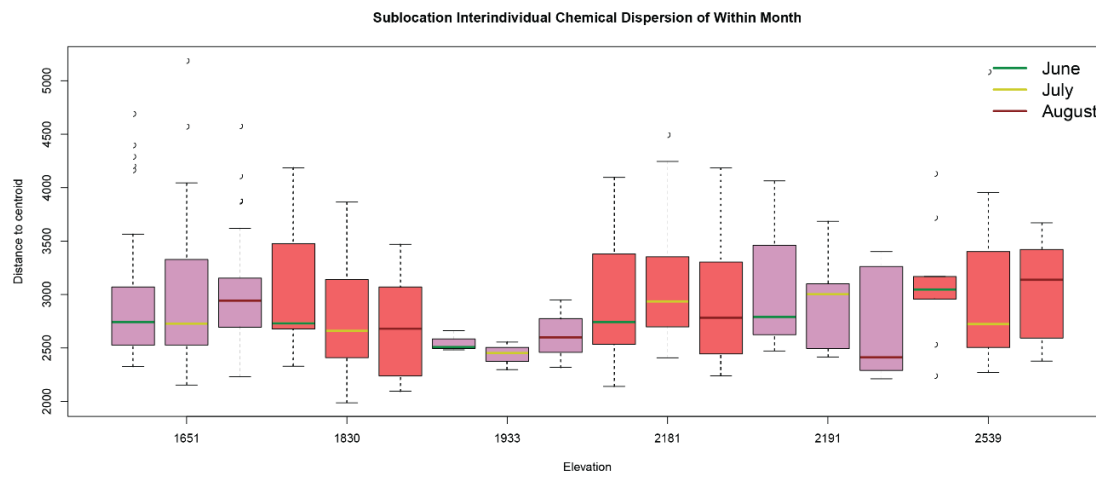

(b)

**Figure S6.** Boxplots of chemical dispersion at two different levels. **(a)** Inter-monthly chemical dispersion of individual plants across an elevational gradient (ANOVA<sub>104,196</sub>  $p < 0.001$ ). **(b)** Subsite-level interindividual dispersion by collection month across an elevational gradient (ANOVA<sub>17,283</sub>  $p < 0.05$ ).



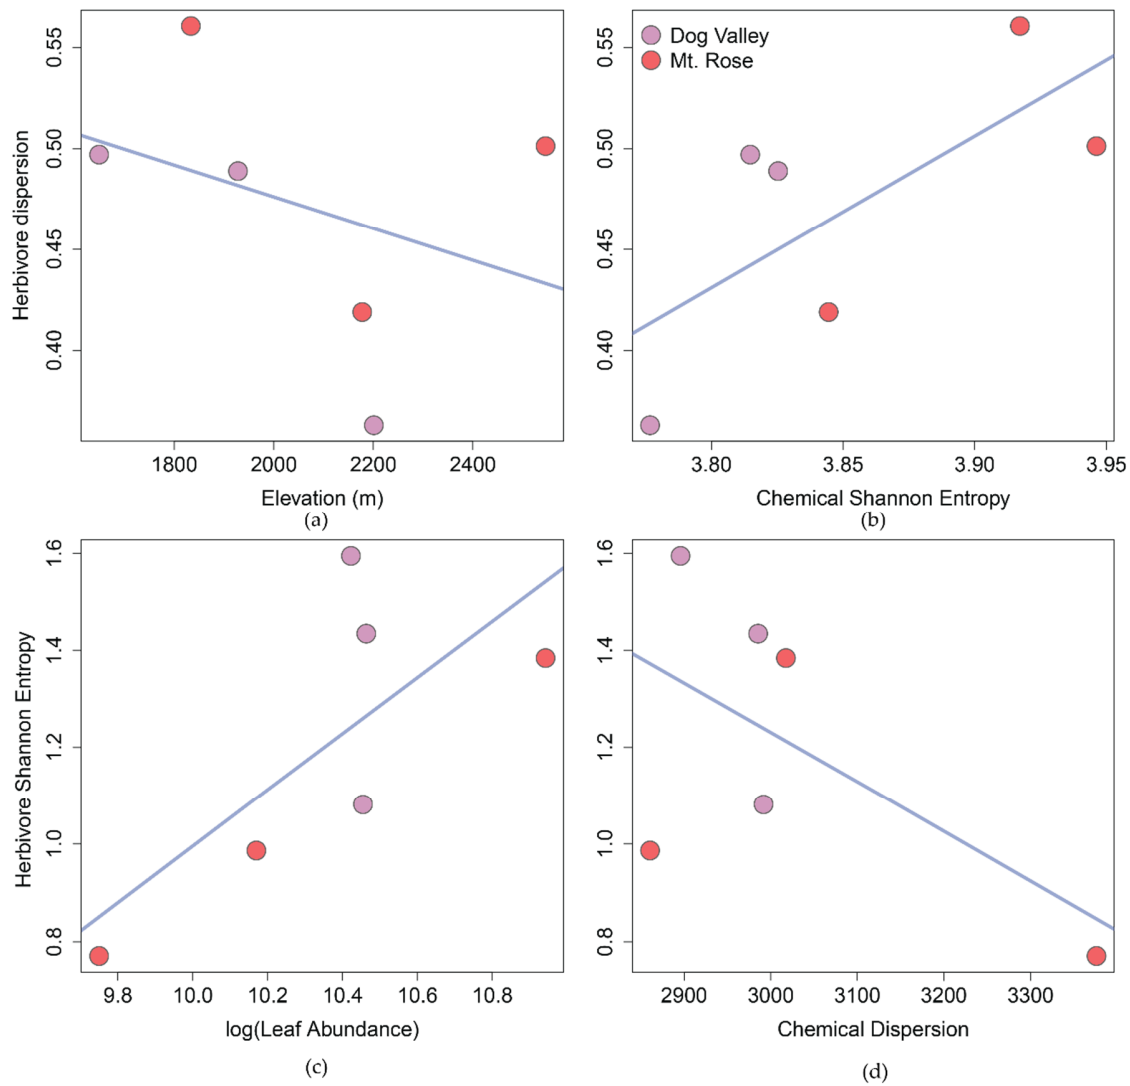

**Figure S7.** Correlations between herbivore dispersion and ecological variables. Herbivore dispersion (mean distance from centroid) is negatively ( $r[6] = -0.60, p < 0.05$ ) correlated with **(a)** elevation and positively correlated ( $r[6] = 0.73, p < 0.01$ ) with **(b)** phytochemical diversity (Shannon Entropy). Herbivore diversity (Shannon Entropy) is positively correlated ( $r[6] = 0.69, p = 0.10$ ) with **(c)** natural log-transformed leaf abundance and negatively correlated ( $r[6] = -0.66, p = 0.21$ ) with **(d)** phytochemical dispersion (mean distance from centroid).

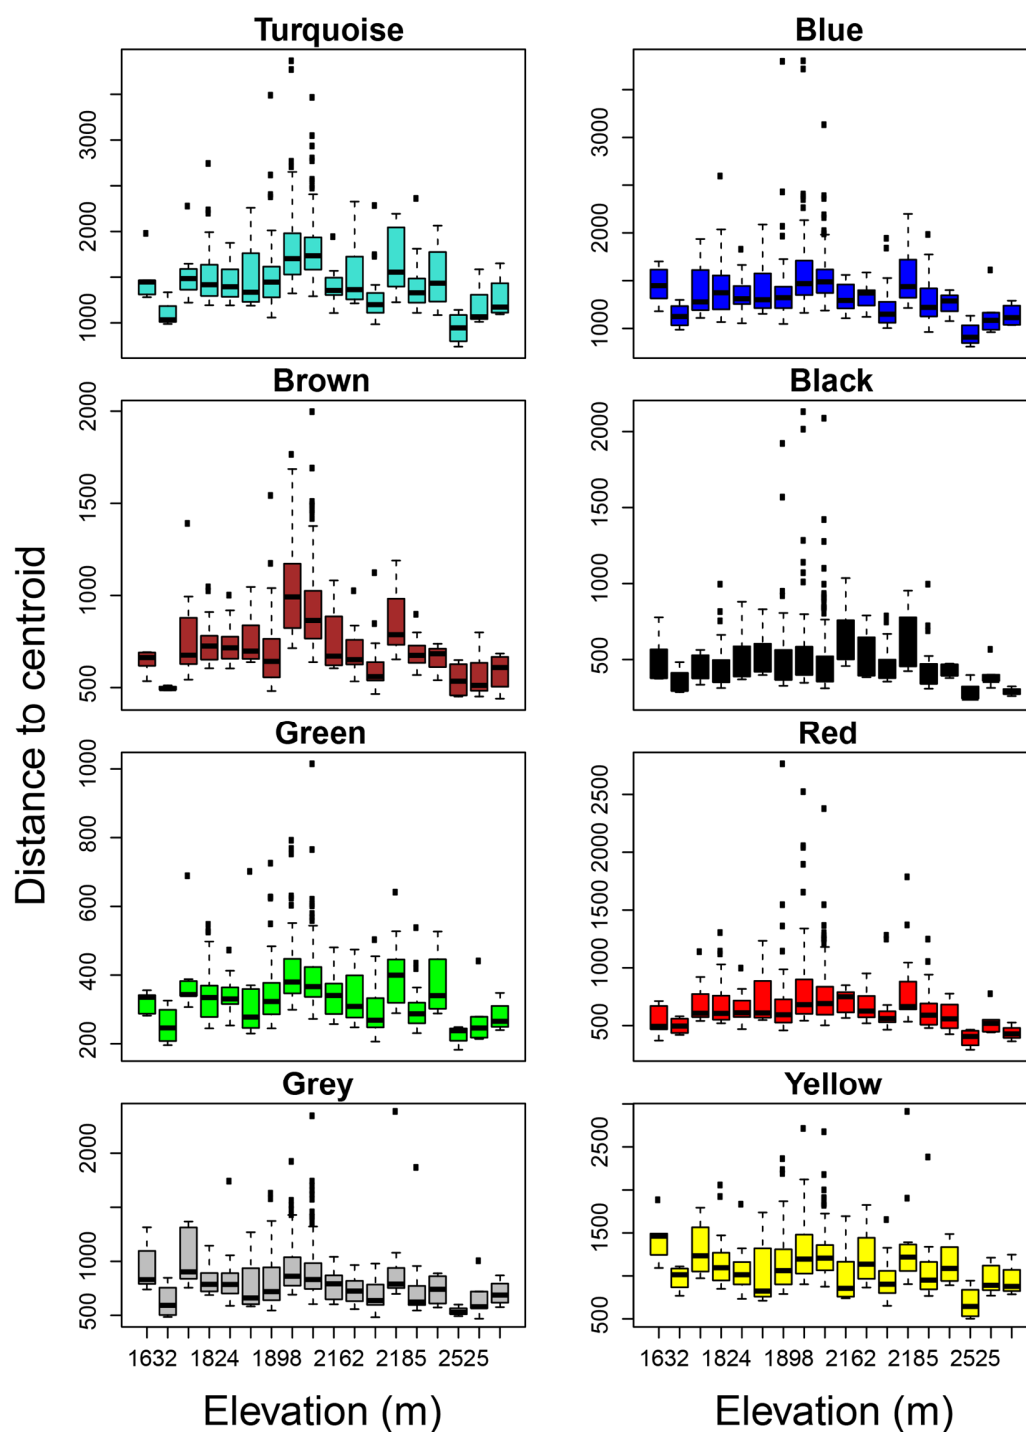

**Figure S8.** Chemical dispersion of phytochemicals partitioned into modules generated from WGCNA across elevation differs between plots. The highest F-statistic values were found for the brown, green and turquoise modules ( $\text{ANOVA}_{17,431}$ ;  $F_{\text{brown}} = 13.9$ ,  $F_{\text{green}} = 4.7$ ,  $F_{\text{turquoise}} = 4.3$ ), while the remaining modules having significant dispersion ( $\text{ANOVA}_{17,431}$ ;  $p < 0.01$ ) had F-statistic values ranging from 2.3-3.5. The black module that did not have significant between-plot dispersion ( $\text{ANOVA}_{17,431}$ ;  $p > 0.1$ ).
